# Supplementary material
Source: PubMed Central journal article supplement (PMC5411347)

**A**

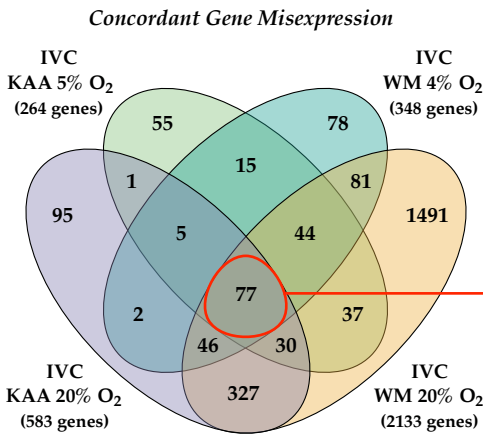

**B**

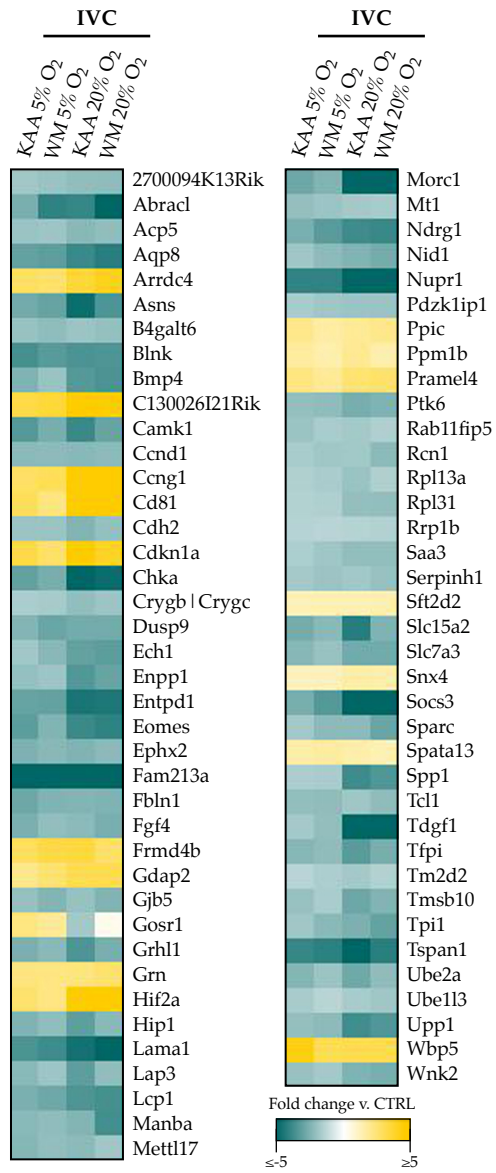

**C**

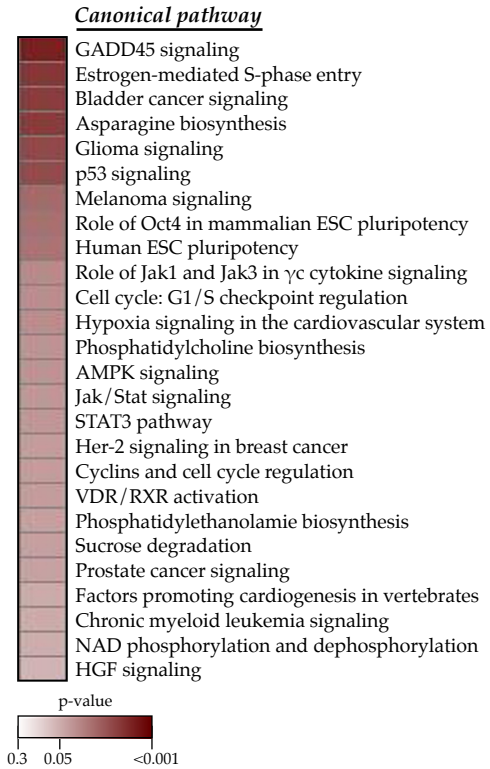

Supplement: NIHMS828224-supplement-01.pdf [file NIHMS828224-supplement-01.pdf]

**A** *Concordant Gene Misexpression*

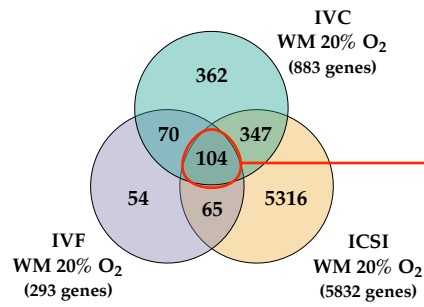

**C** *Canonical pathway*

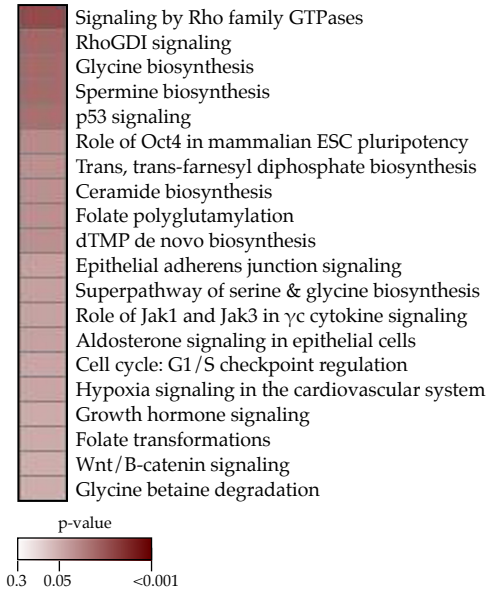

**B** *Fertilization*

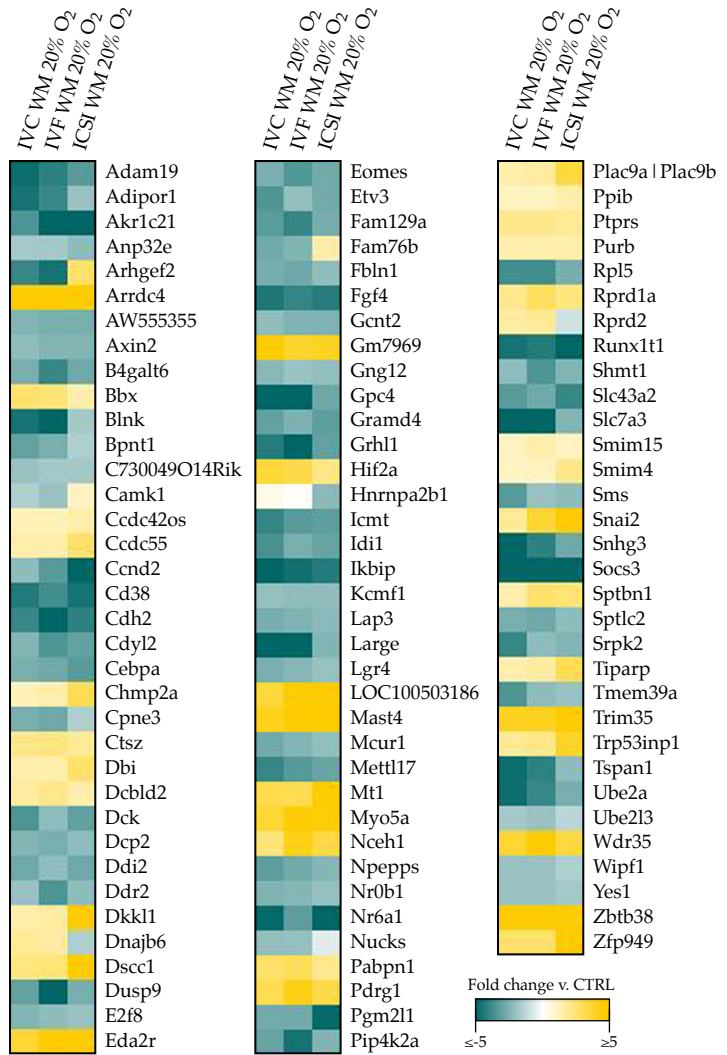

Supplement: NIHMS828224-supplement-02.pdf [file NIHMS828224-supplement-02.pdf]

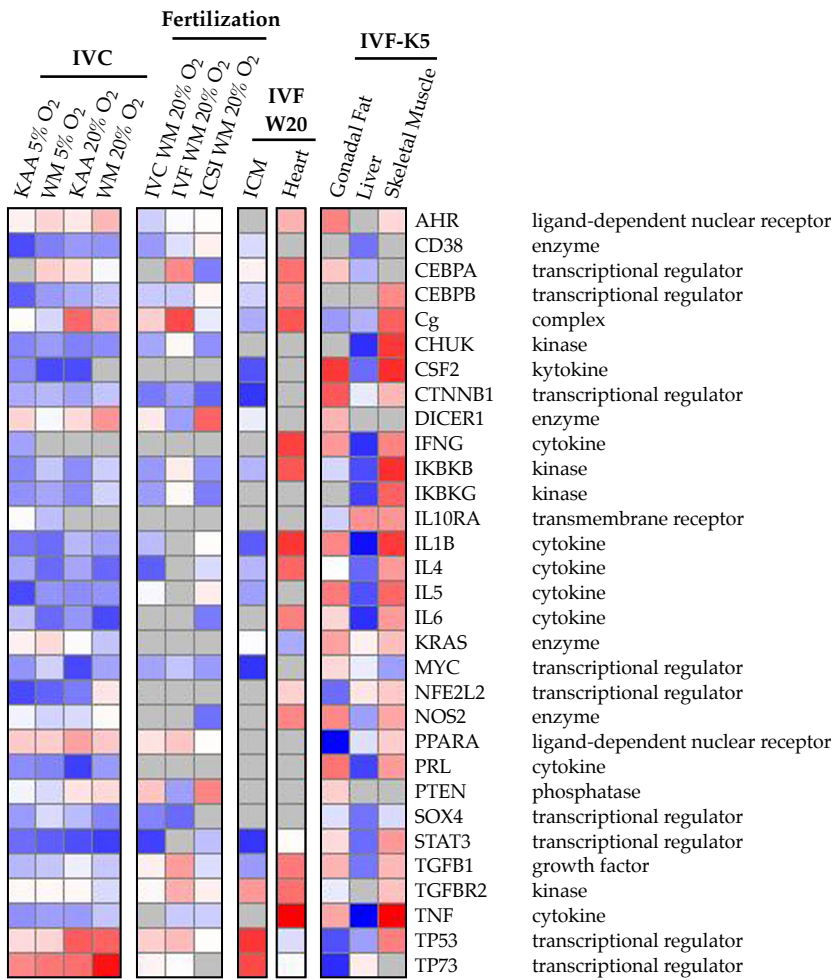

Supplement: NIHMS828224-supplement-03.pdf [file NIHMS828224-supplement-03.pdf]
